# Supplementary material for: The history of seabird colonies and the North Water ecosystem: Contributions from palaeoecological and archaeological evidence
Source: Springer Nature journal article supplement (doi:10.1007/s13280-018-1031-1), 2018-03-07

*Ambio*

Electronic Supplementary Material

*This supplementary material has not been peer reviewed.*

**Title: The history of seabird colonies and the North Water ecosystem:  
Contributions from palaeoecological and archaeological evidence**

*Thomas A. Davidson, Sebastian Wetterich, Kasper L. Johansen, Bjarne Grønnow, Torben Windirsc<sup>1</sup>, Erik Jeppesen, Jari Syvyräntä, Jesper Olsen, Ivan González-Bergonzoni, Astrid Strunk, Nicolaj K. Larsen, Hanno Meyer, Jens Søndergaard, Rune Dietz, Igor Eulears & Anders Mosbech*

## Supplementary figures

Figure S1. Depth age model of Bayesian based modelling of  $^{14}\text{C}$  dates for NOW5a – Qertartat (Salve Ø)

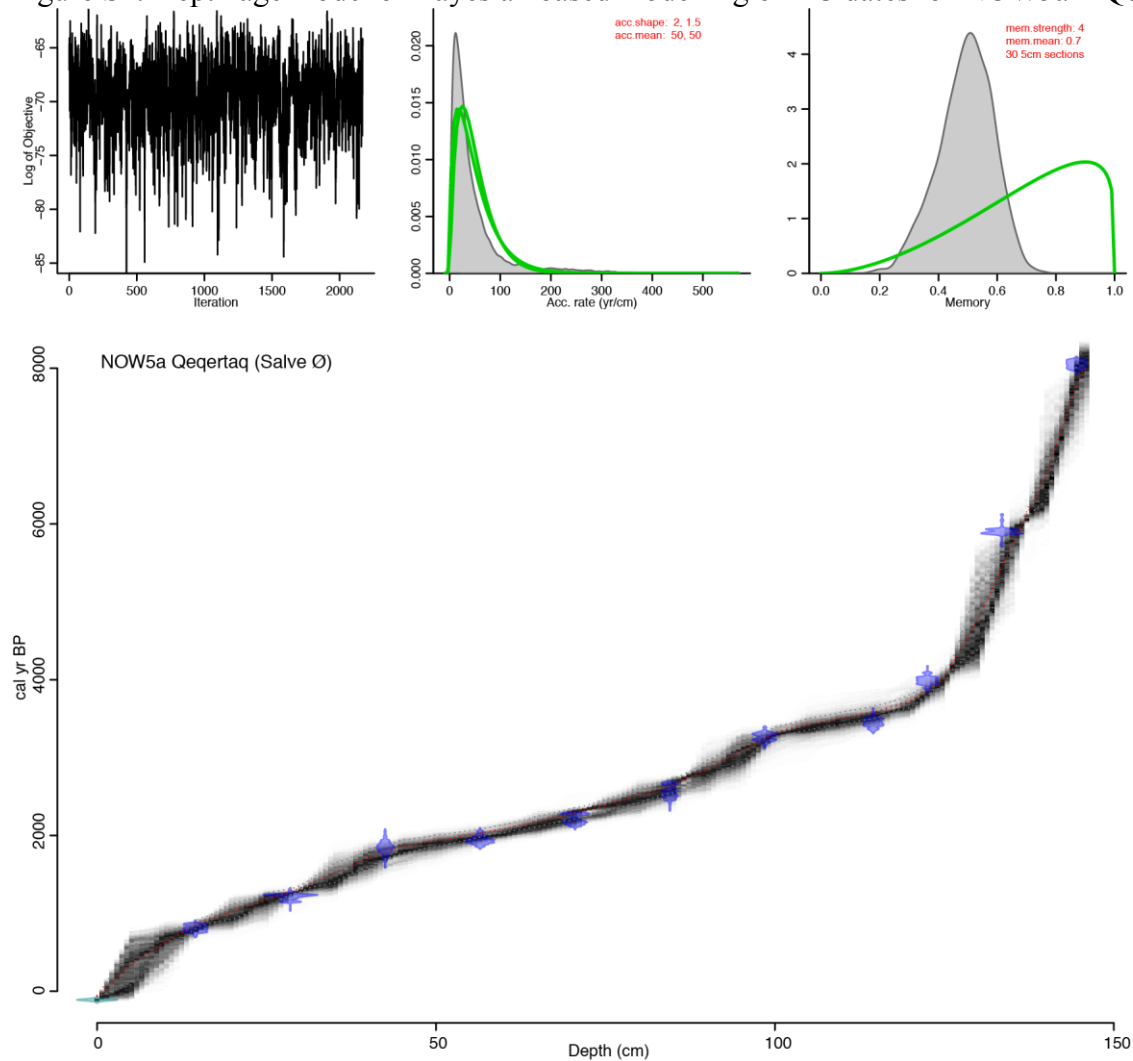

Figure S2. Depth age model of Bayesian based modelling of  $^{14}\text{C}$  dates for GL3– Annikitsq

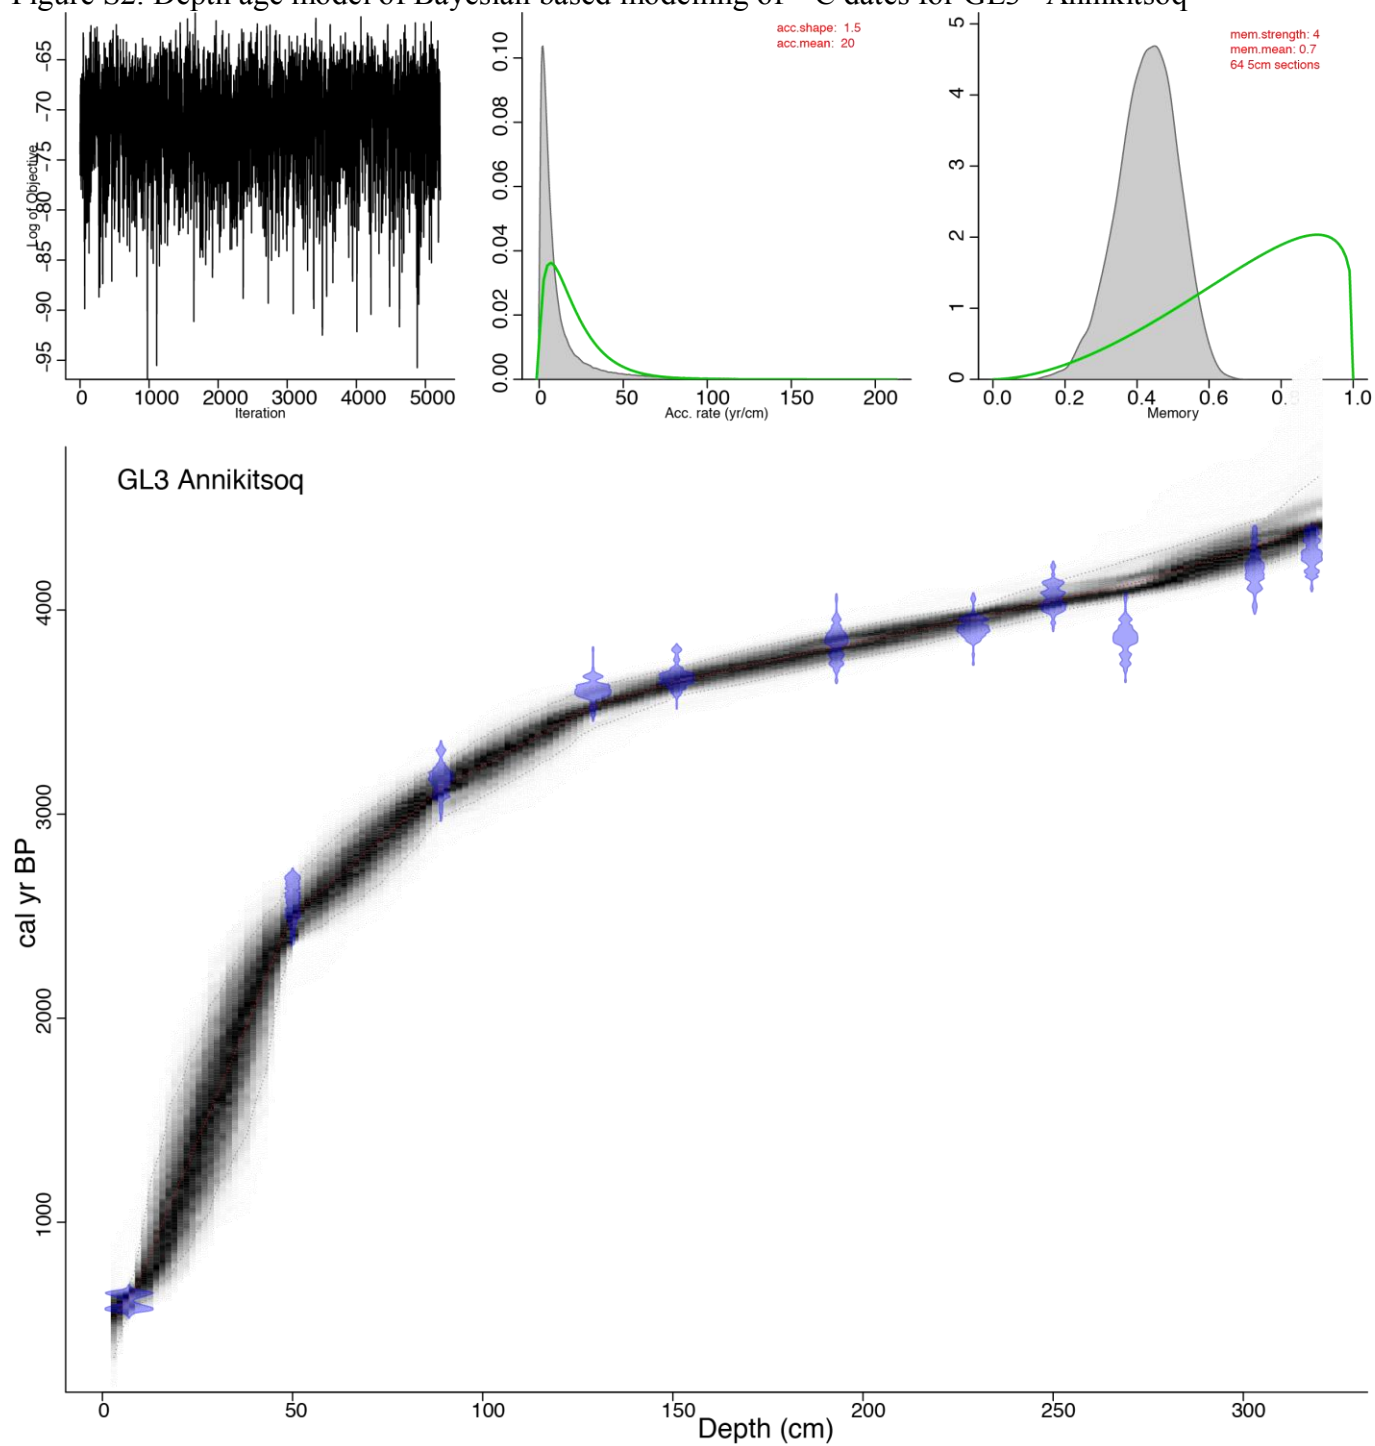

Figure S3. Depth age model of Bayesian based modelling of  $^{14}\text{C}$  dates for SD1– Qoororsuaq

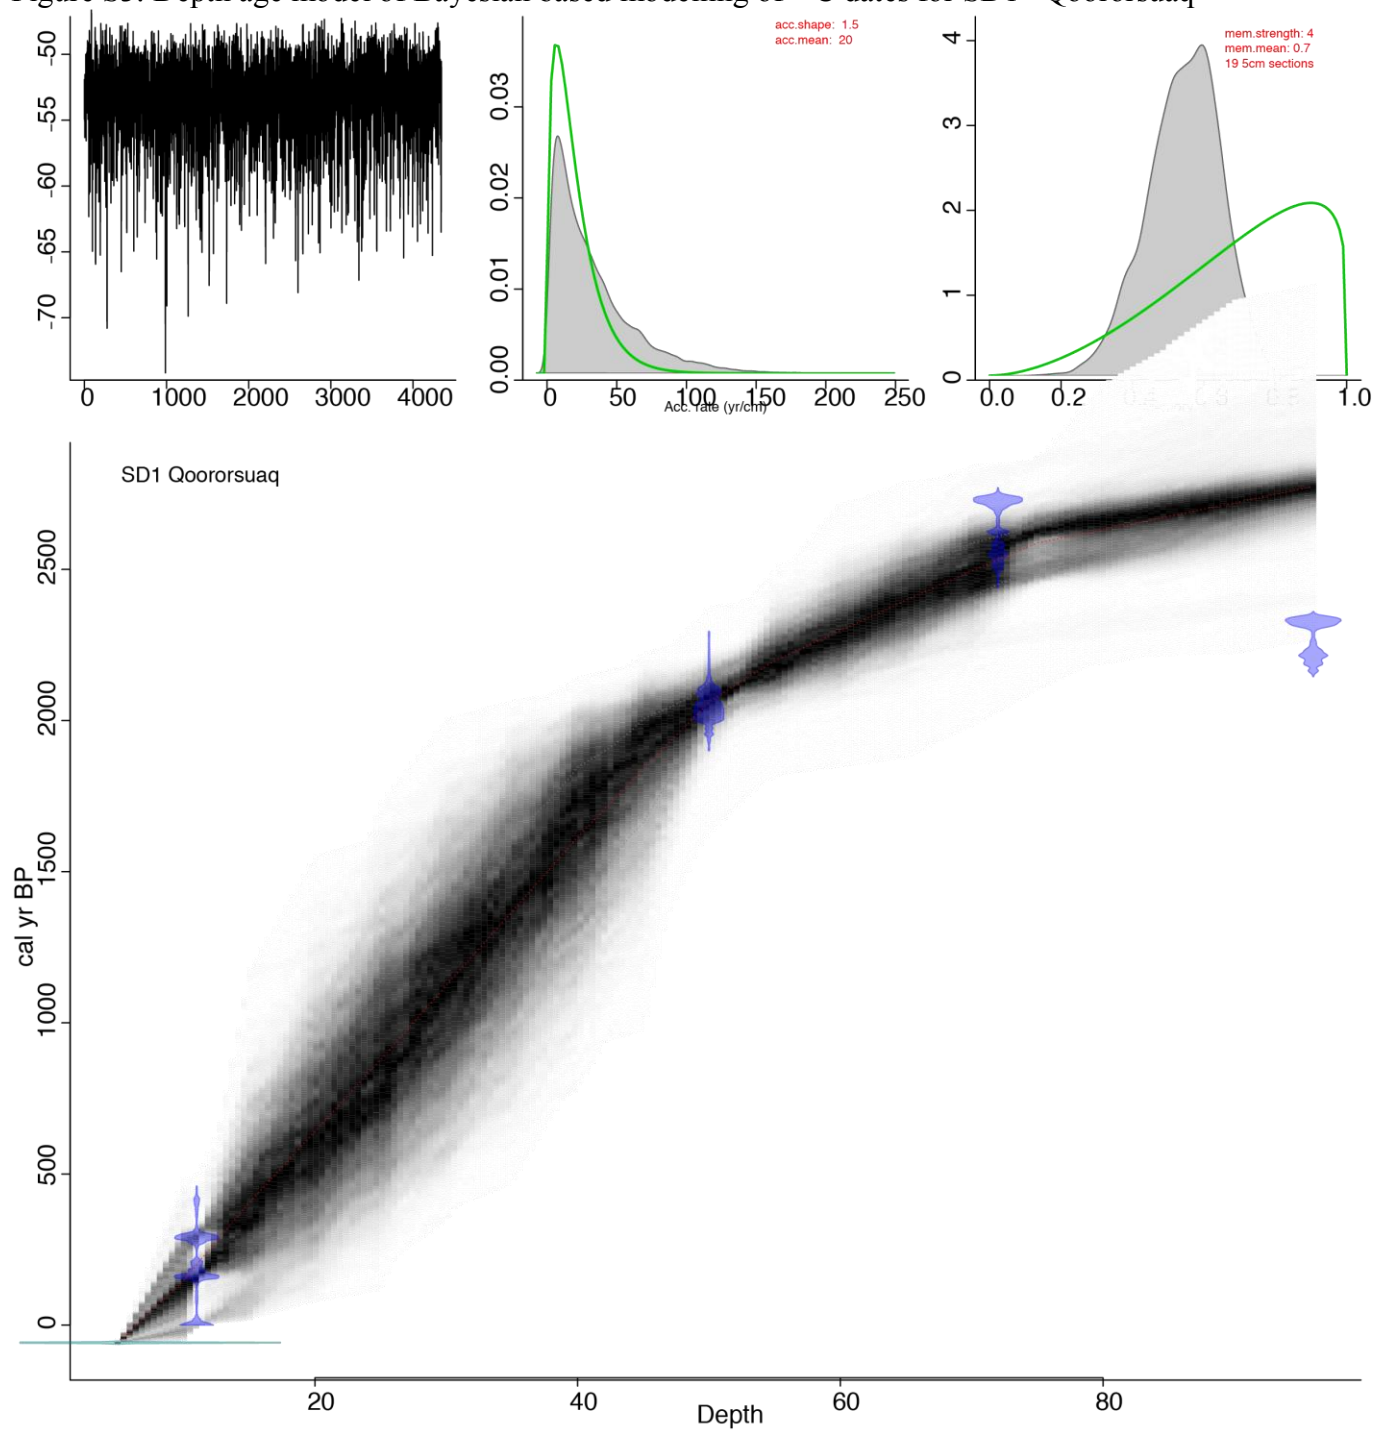

Figure S4. Depth age model of Bayesian based modelling of  $^{14}\text{C}$  dates for RF1– Kuukkat

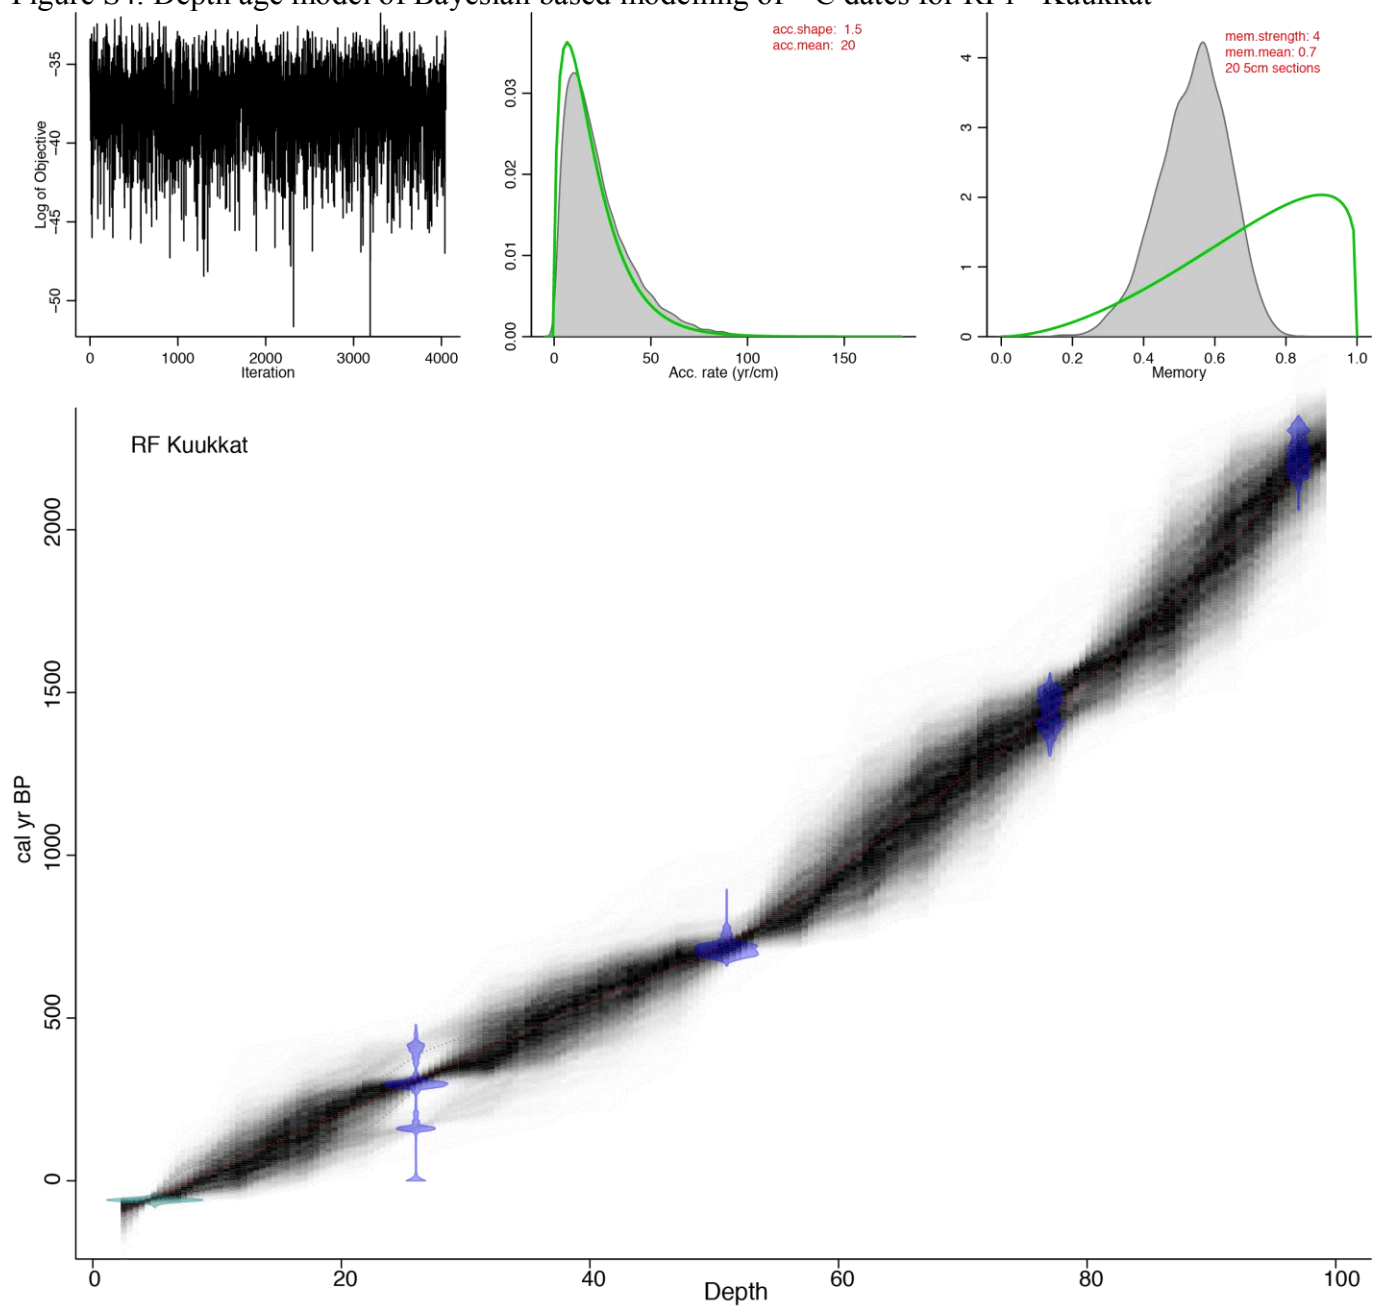

Figure S5. Depth age model of Bayesian based modelling of  $^{14}\text{C}$  dates for SI – Appat (Saunders Ø)

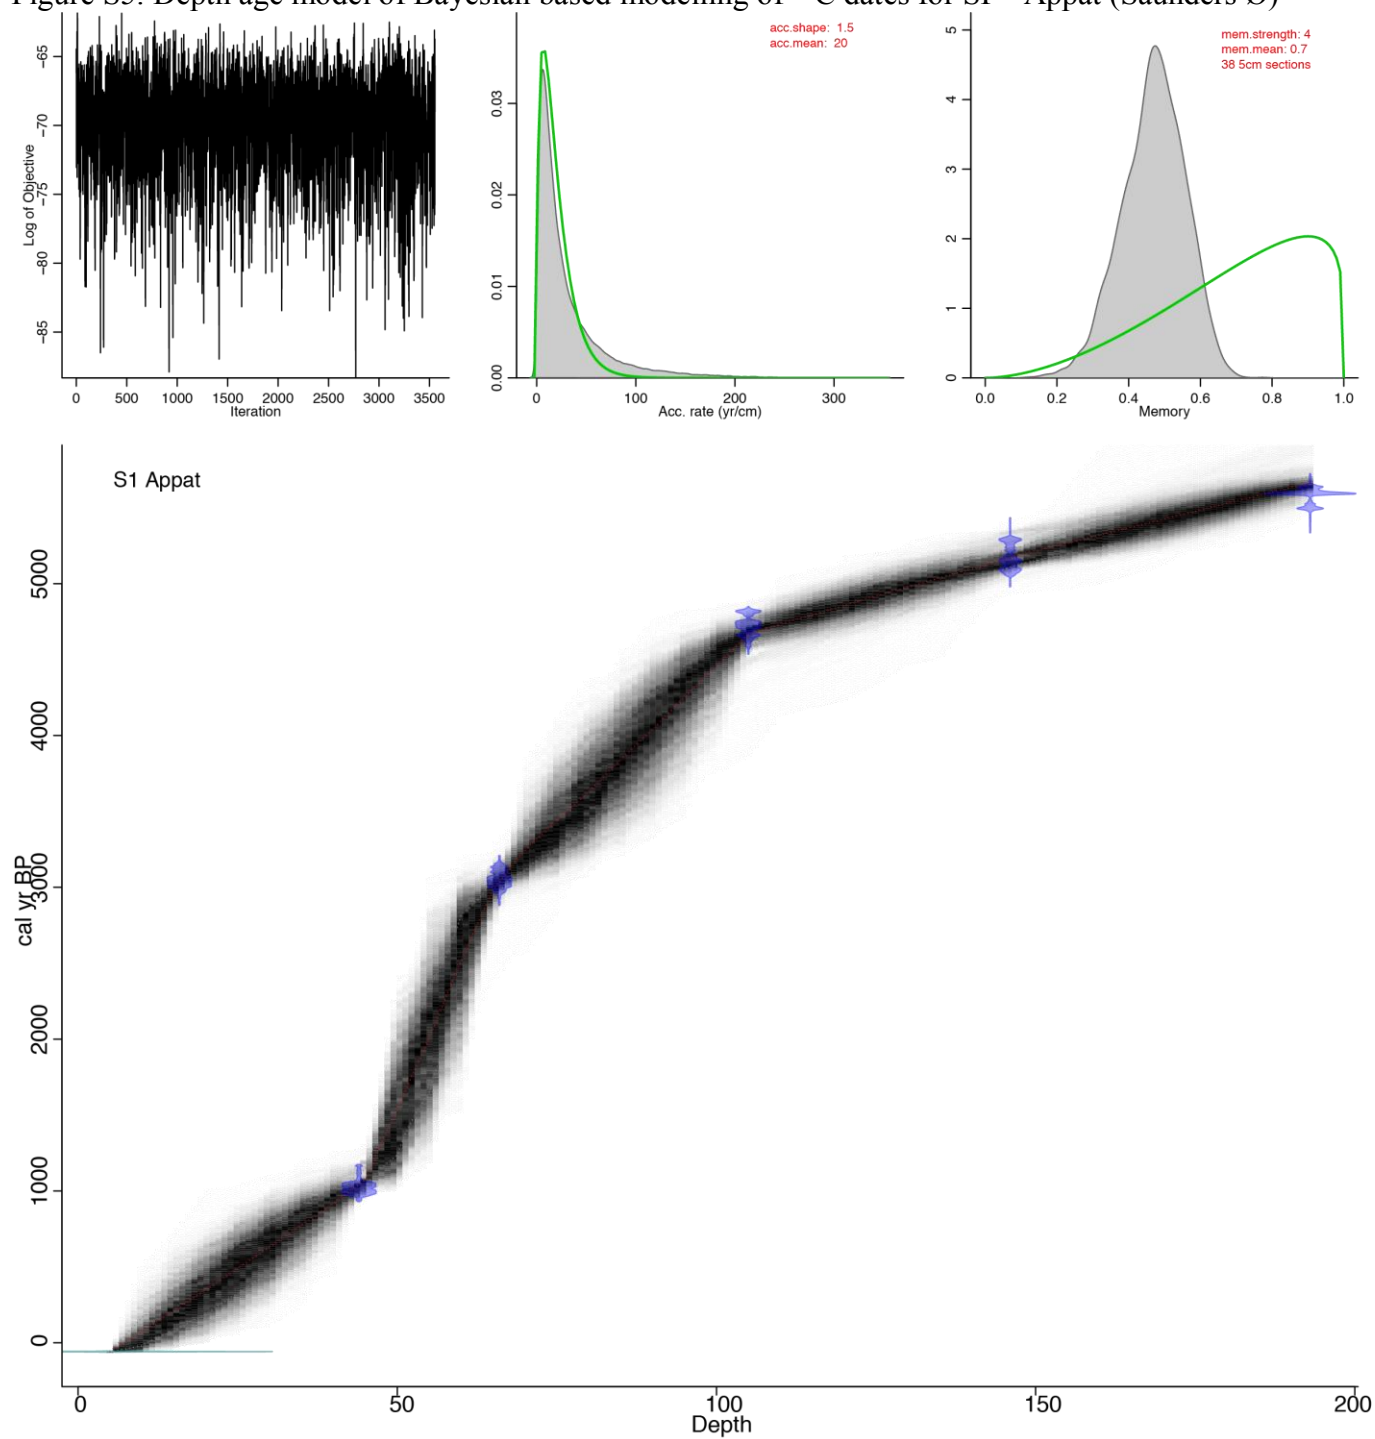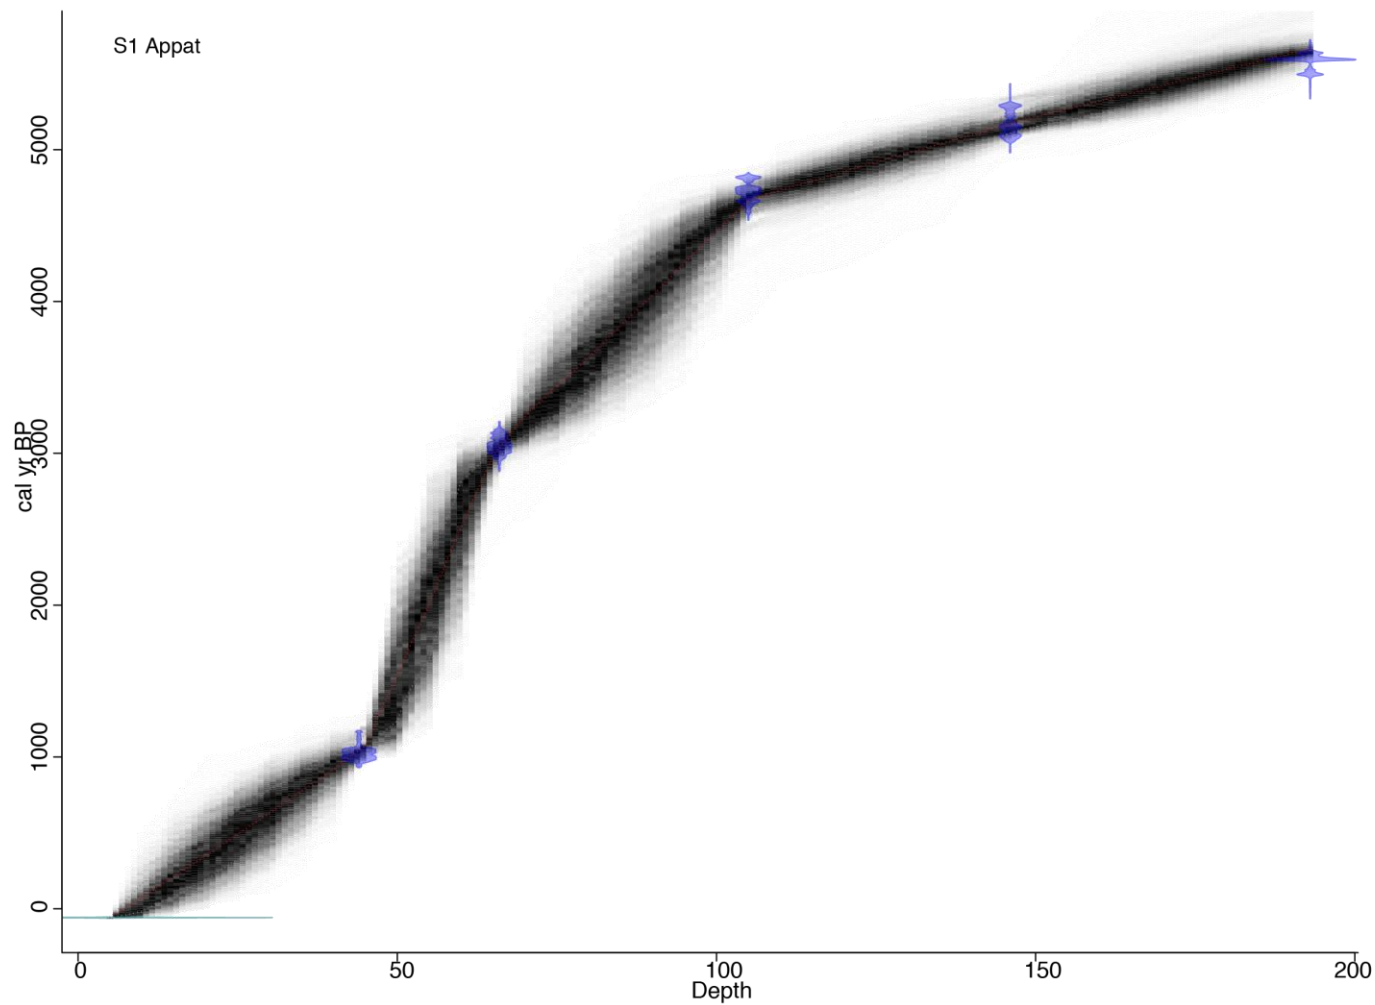

Figure S6. Depth age model of Bayesian based modelling of  $^{14}\text{C}$  dates for TSB2 Iterlassuup Qeqertaarsui

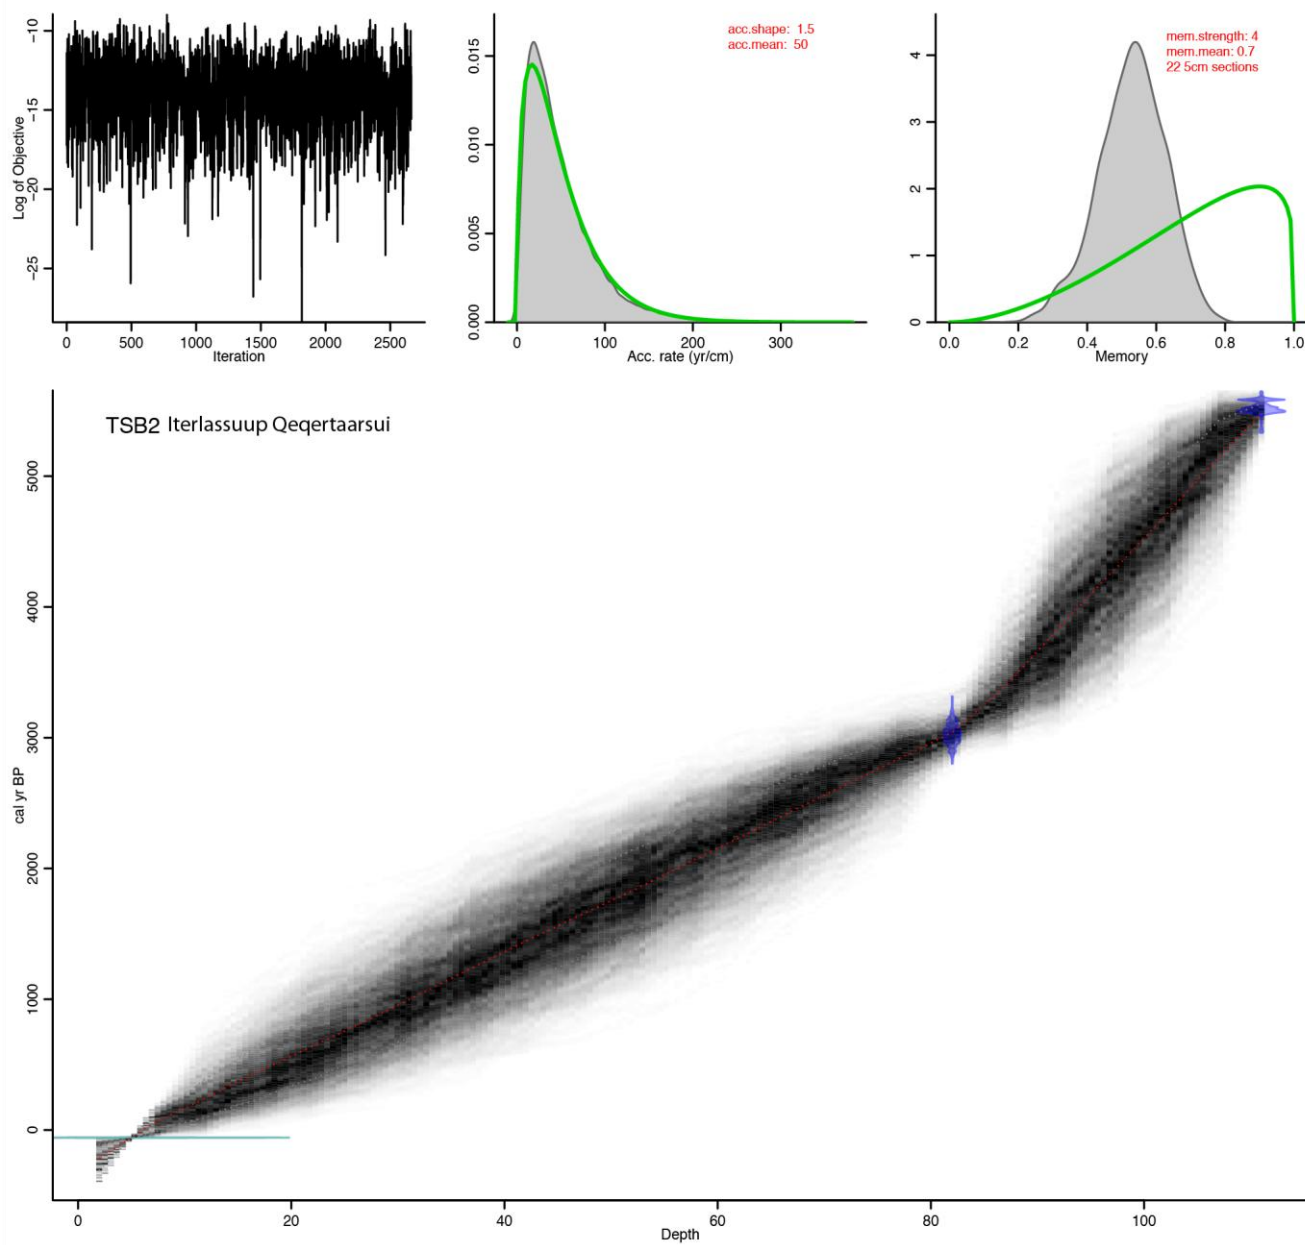

Figure S7. Depth age model of Bayesian based modelling of  $^{14}\text{C}$  dates for BS1 Booth Sund

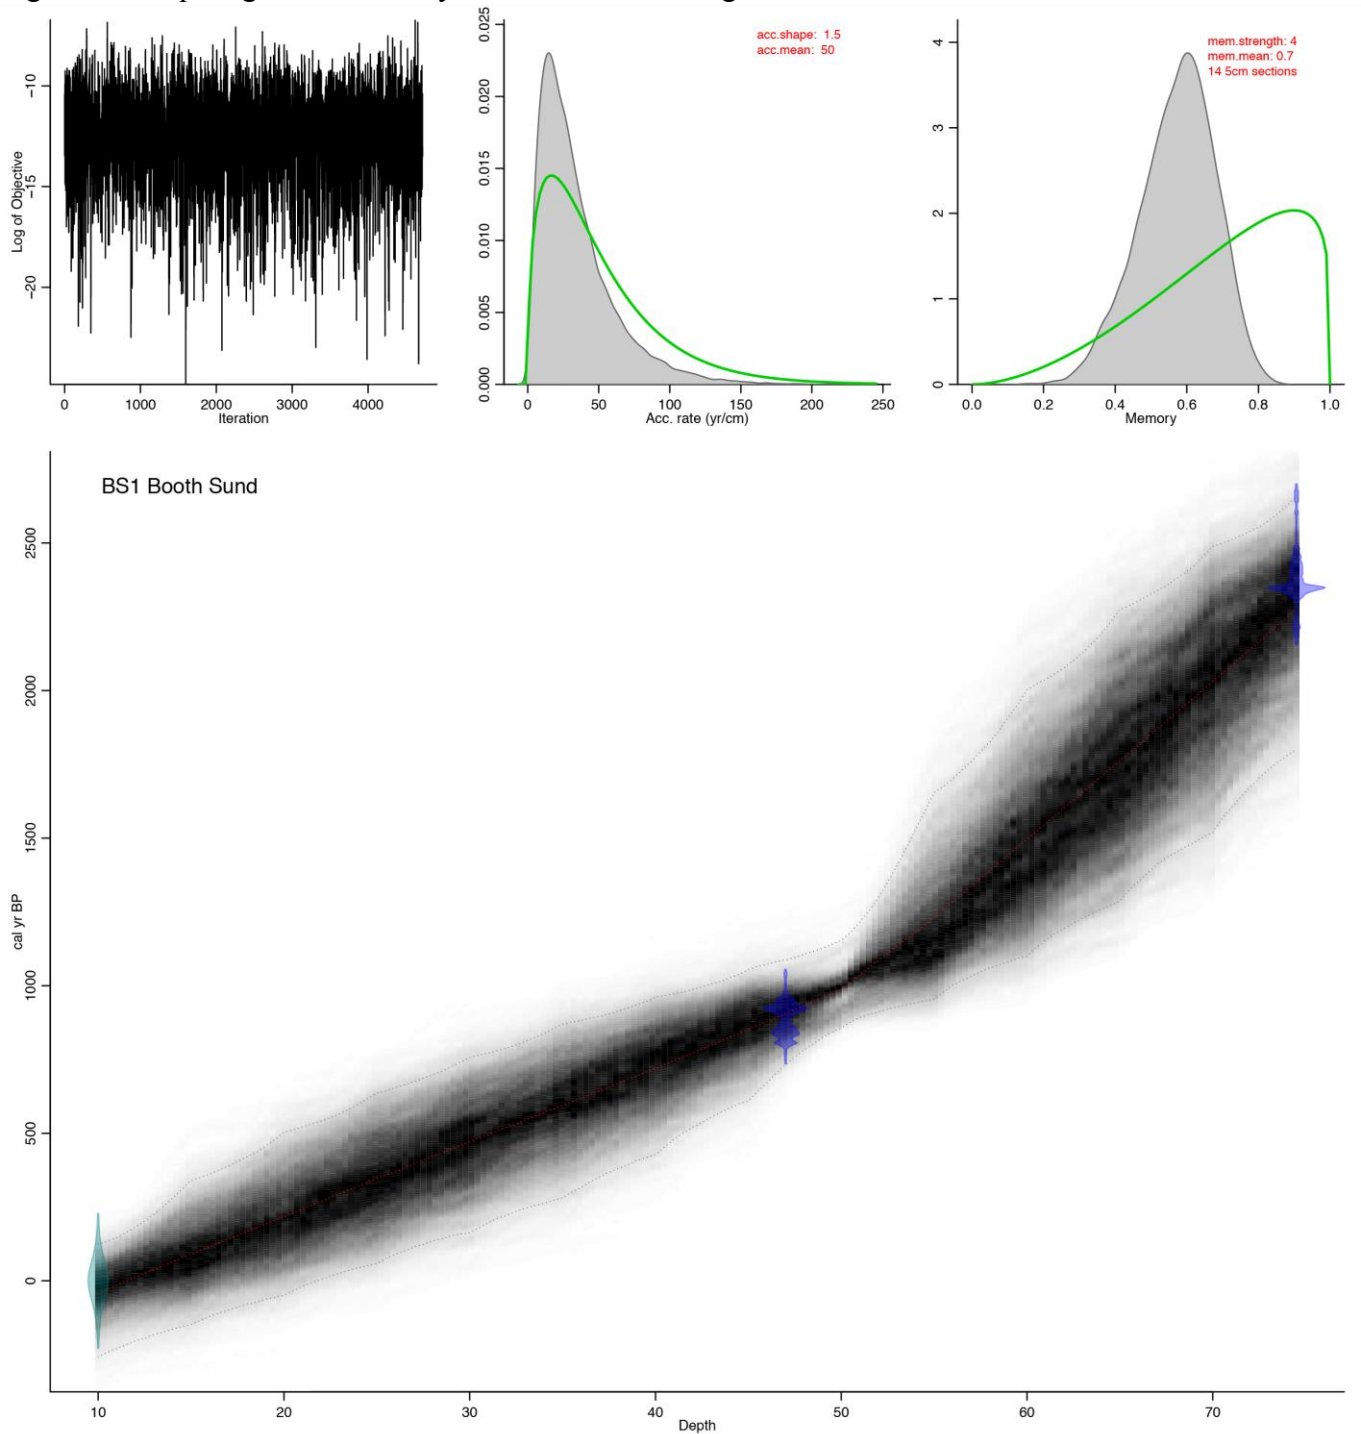

Supplement: MOESM1 [file 15655072]
